# Supplementary material for: Phase I study of tomuzotuximab, a glycoengineered therapeutic antibody against the epidermal growth factor receptor, in patients with advanced carcinomas
Source: PubMed Central journal article supplement — ESMO Open. 2018 Feb 1;3(2):e000303. doi: 10.1136/esmoopen-2017-000303 (PMC5812399; doi:10.1136/esmoopen-2017-000303), 2018-02-01
Supplement: esmoopen-2017-000303supp003.pdf [file esmoopen-2017-000303supp003.pdf]

| Table S1. Noncompartmental serum pharmacokinetic (PK) parameters for tomuzotuximab (mean ± SD) measured at first infusion (37 patients)                                                                                                                                                                                                                                                                                                                                                                                                                                  |                          |                          |                  |                                    |                                |                    |                       |             |
|--------------------------------------------------------------------------------------------------------------------------------------------------------------------------------------------------------------------------------------------------------------------------------------------------------------------------------------------------------------------------------------------------------------------------------------------------------------------------------------------------------------------------------------------------------------------------|--------------------------|--------------------------|------------------|------------------------------------|--------------------------------|--------------------|-----------------------|-------------|
| Every week                                                                                                                                                                                                                                                                                                                                                                                                                                                                                                                                                               |                          |                          |                  |                                    |                                |                    |                       |             |
| Dose (mg)                                                                                                                                                                                                                                                                                                                                                                                                                                                                                                                                                                | C <sub>max</sub> (µg/mL) | C <sub>min</sub> (µg/mL) | T <sub>max</sub> | AUC <sub>0-tlast</sub> (µg · h/mL) | AUC <sub>0-∞</sub> (µg · h/mL) | t <sub>½</sub> (h) | V <sub>z</sub> (L/kg) | CL (L/h)    |
| 12                                                                                                                                                                                                                                                                                                                                                                                                                                                                                                                                                                       | 1.19 (0.7)               | nc <sup>a</sup>          | 3.4 (0.9)        | 9.4 (11.8)                         | 10.9 (12.4)                    | 3.85 (2.6)         | 0.12 (0.04)           | 2.39 (1.78) |
| 60                                                                                                                                                                                                                                                                                                                                                                                                                                                                                                                                                                       | 13.4 (4.2)               | nc <sup>a</sup>          | 3.7 (0.6)        | 237 (76)                           | 572 (197)                      | 29.2 (6.5)         | 0.07 (0.01)           | 0.12 (0.05) |
| 120                                                                                                                                                                                                                                                                                                                                                                                                                                                                                                                                                                      | 22.7 (1.6)               | nc <sup>a</sup>          | 7.4 (1.1)        | 381 (75)                           | 1703 (1028)                    | 48.0 (27.9)        | 0.07 (0.01)           | 0.09 (0.05) |
| 240                                                                                                                                                                                                                                                                                                                                                                                                                                                                                                                                                                      | 59.4 (15.6)              | 4.07 (0.4)               | 7.3 (4.1)        | 3431 (2354)                        | 3943 (1884)                    | 36.4 (7.3)         | 0.04 (0.01)           | 0.08 (0.05) |
| 480                                                                                                                                                                                                                                                                                                                                                                                                                                                                                                                                                                      | 130 (24.0)               | 28.0 (16.9)              | 7.7 (1.3)        | 10998 (3790)                       | 14634 (6420)                   | 77.1 (19.7)        | 0.05 (0.02)           | 0.04 (0.01) |
| 720                                                                                                                                                                                                                                                                                                                                                                                                                                                                                                                                                                      | 179 (53.5)               | 42.2 (12.3)              | 15.9 (11.2)      | 13564 (3304)                       | 18916 (4716)                   | 84.9 (11.2)        | 0.07 (0.01)           | 0.04 (0.01) |
| 990                                                                                                                                                                                                                                                                                                                                                                                                                                                                                                                                                                      | 247 (12.5)               | 73.4 (7.5)               | 16.5 (12.6)      | 21092 (364)                        | 31405 (433)                    | 97.6 (2.7)         | 0.07 (0.01)           | 0.03 (0.00) |
| 1370                                                                                                                                                                                                                                                                                                                                                                                                                                                                                                                                                                     | 408 (89.8)               | 94.9 (52.5)              | 28.9 (2.7)       | 31019 (7385)                       | 42370 (13963)                  | 77.0 (21.4)        | 0.06 (0.01)           | 0.04 (0.01) |
| Every two weeks                                                                                                                                                                                                                                                                                                                                                                                                                                                                                                                                                          |                          |                          |                  |                                    |                                |                    |                       |             |
| 990                                                                                                                                                                                                                                                                                                                                                                                                                                                                                                                                                                      | 241 (75.7)               | 13.9 (0.5)               | 9.7 (0.71)       | 24454 (4407)                       | 26227 (4434)                   | 88.9 (0.8)         | 0.05 (0.01)           | 0.04 (0.01) |
| <sup>a</sup> Values were below the lower limit of quantification of 0.103 µg/mL.<br>Abbreviations: AUC <sub>0-∞</sub> , area under the plasma concentration time curve from time 0 to infinity; AUC <sub>0-tlast</sub> , area under the plasma concentration time curve from time 0 to the last measured concentration; CL, clearance; C <sub>max</sub> , maximum drug concentration; C <sub>min</sub> , minimum drug concentration; h, hours; nc, not calculated; SD, standard deviation; t <sub>½</sub> , terminal half-life; V <sub>z</sub> , volume of distribution. |                          |                          |                  |                                    |                                |                    |                       |             |
